# Supplementary material for: π-Donor/π-Acceptor Interactions for the Encapsulation of Neurotransmitters on Functionalized Polysilicon-Based Microparticles
Source: MDPI journal article supplement (doi:10.3390/pharmaceutics12080724), 2020-08-01
Supplement: s1 [file s1]

# Supplementary Materials: $\pi$ -Donor/ $\pi$ -Acceptor Interactions for the Encapsulation of Neurotransmitters on Functionalized Polysilicon-Based Microparticles

Sandra Giraldo, María E. Alea-Reyes, David Limón, Asensio González, Marta Duch, José A. Plaza, David Ramos-López, Joaquín de Lapuente, Arántzazu González-Campo \* and Lluïsa Pérez-García

## 1. Synthesis and Characterization of Bipyridinium Salts

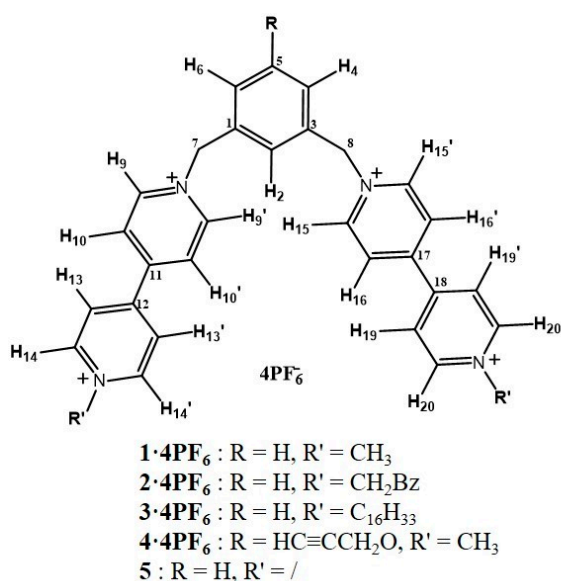

**Figure S1.** Numbering of the hydrogen and carbon atoms in the structures of  $1 \cdot 4PF_6$ – $4 \cdot 4PF_6$  and **5**.

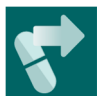

1.1. Characterization of 1,3-Bis(1'-methyl-4,4'-bipyridiniummethylene) Benzene-Tetrakis (Hexafluorophosphate) (**1·4PF<sub>6</sub>**)

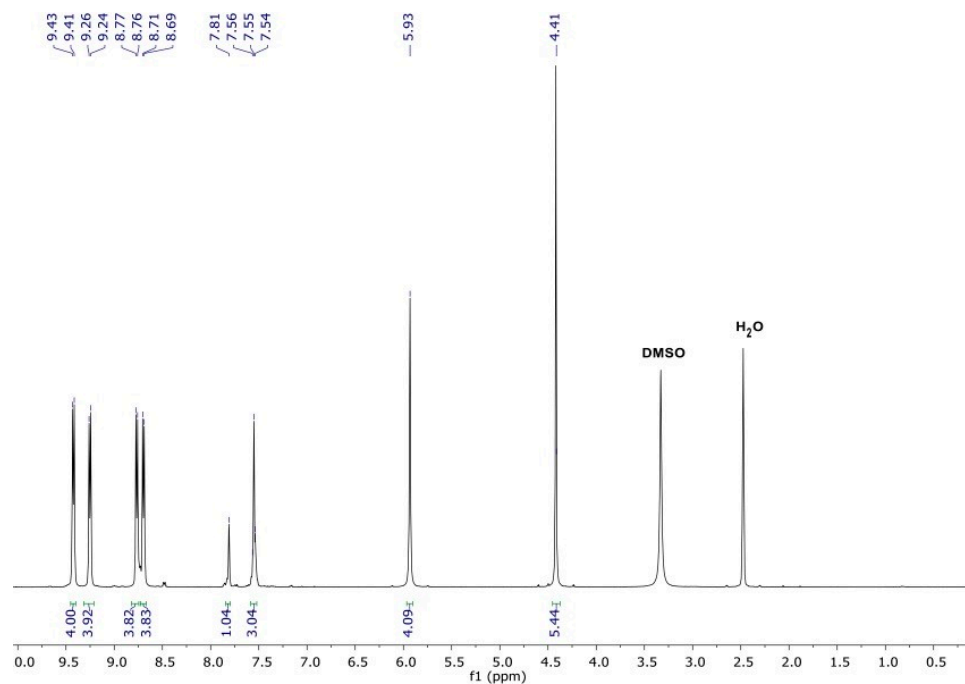

Figure S2. <sup>1</sup>H NMR (400 MHz) spectrum of **1·4PF<sub>6</sub>** in (CD<sub>3</sub>)<sub>2</sub>SO.

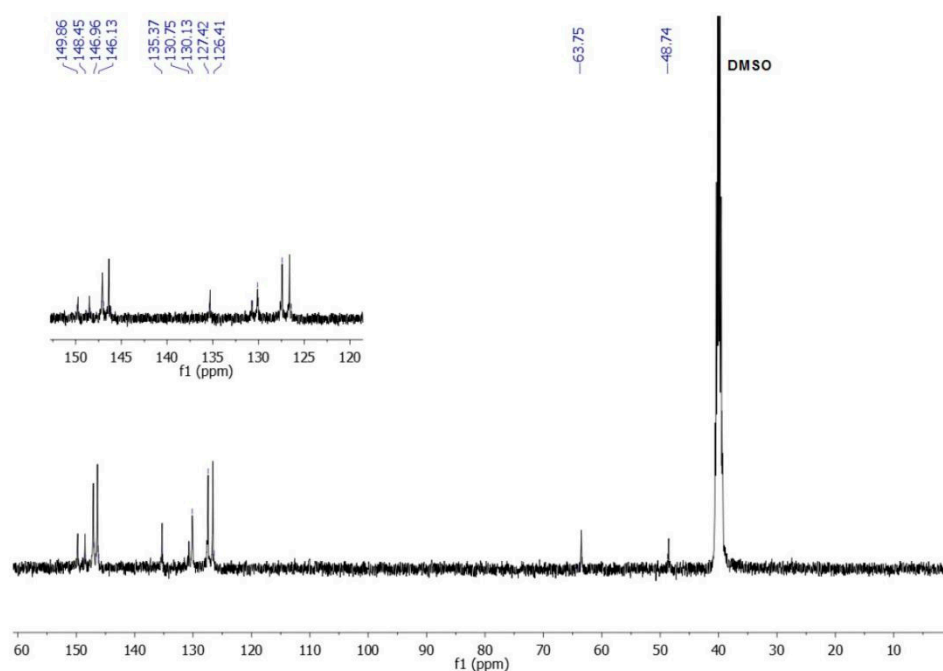

Figure S3. <sup>13</sup>C NMR (400 MHz) spectrum of **1·4PF<sub>6</sub>** in (CD<sub>3</sub>)<sub>2</sub>SO.

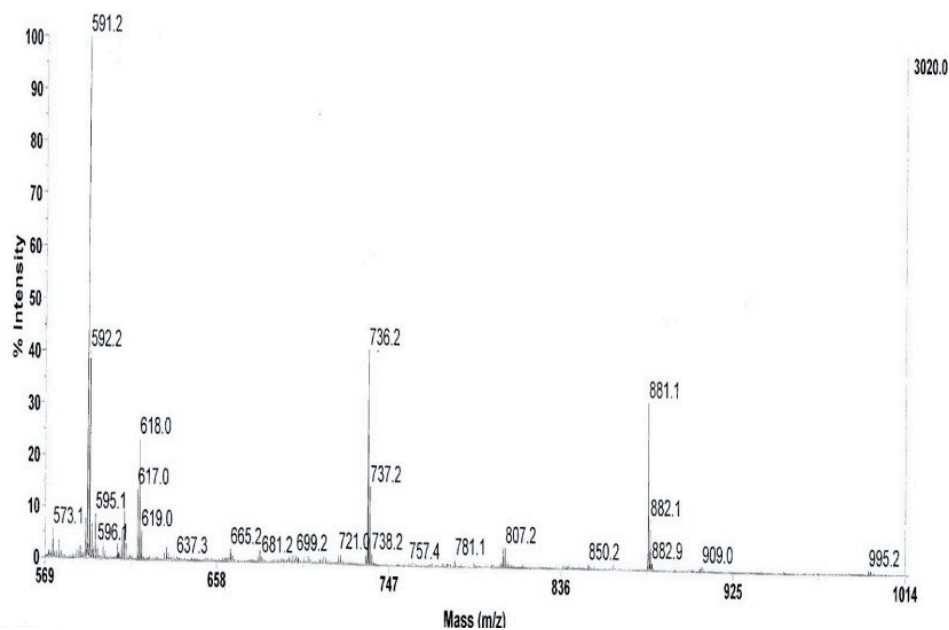

Figure S4. MALDI-TOF-MS (m/z) spectrum of 1·4PF<sub>6</sub> with matrix DHB.

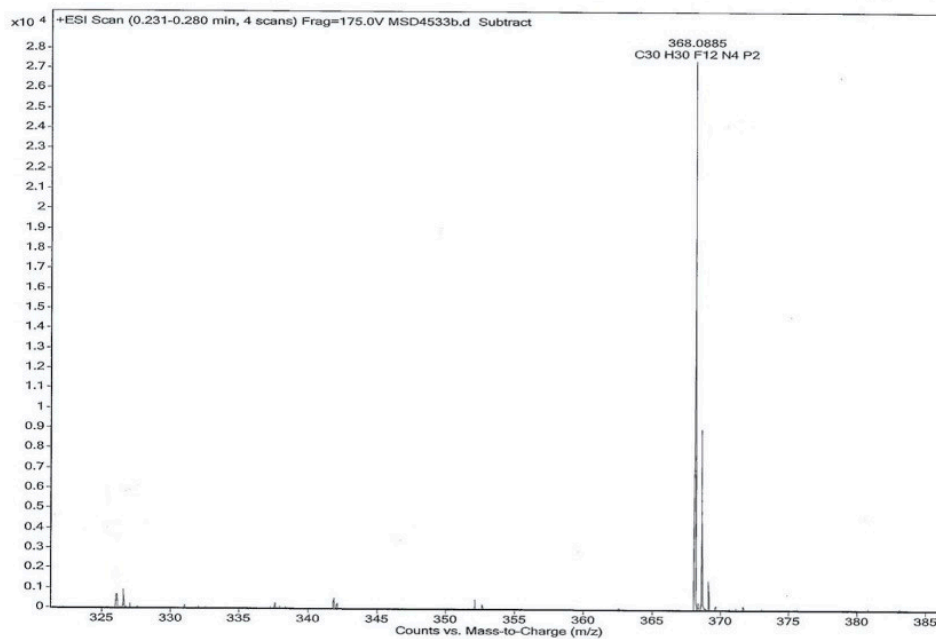

Figure S5. HMRS-ESI (m/z) spectrum of 1·4PF<sub>6</sub>.

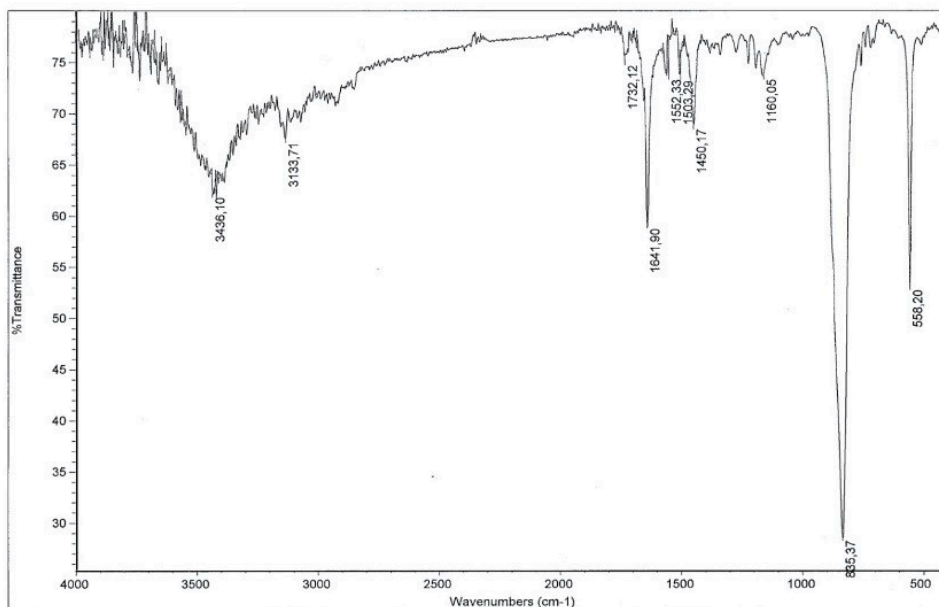

Figure S6. FT-IR transmittance spectrum of **1·4PF<sub>6</sub>** in KBr.

1.2. Synthesis and Characterization of 1,3-Bis(1'-dibenzyl-4,4'-bipyridinium methylene) Benzene Tetrakis (Hexafluorophosphate) (**2·4PF<sub>6</sub>**):

A solution of **5** (0.7 g, 1.1 mmol) in CH<sub>3</sub>NO<sub>2</sub> (30 mL) was added to a solution of benzyl bromide (1.2 g, 6.9 mmol) in CH<sub>3</sub>NO<sub>2</sub> (4 mL). The mixture was heated at 80 °C for 3 h. After cooling down to room temperature, the solvent was evaporated in vacuum. The yellow residue was then dissolved in H<sub>2</sub>O (10 mL), and a saturated aqueous solution of NH<sub>4</sub>PF<sub>6</sub> (1.1 g, 6.8 mmol, 3 mL) was added until no further precipitation was observed. The suspension was filtered off and the white solid was washed with H<sub>2</sub>O (30 mL), filtered off and dried under vacuum to afford **2·4PF<sub>6</sub>** (0.9 g, 85%). mp = 260 °C (Lit. [1] ); <sup>1</sup>H NMR (400 MHz, (CD<sub>3</sub>)<sub>2</sub>SO, 25 °C): δ 9.48 (d, *J* = 4 Hz, 4H, H-9, 9', 15, 15'), 9.42 (d, *J* = 4 Hz, 4H, H-14, 14', 20, 20'), 8.73 (dd, *J* = 4 Hz, *J* = 4 Hz, 8H, H-10, 10', 16, 16', 13, 13', 19, 19'), 7.82 (s; 1H, H-2); 7.59 (d, *J* = 4 Hz, 4H, H-Bz), 7.57 (d, *J* = 4 Hz, 4H, H-Bz), 7.54 (s; 2H, H-Bz); 7.45 (m; 3H, H-4, 5, 6), 5.92 (s; 8H, H-7, 8, -CH<sub>2</sub>-Bz). MALDI-TOF-MS *m/z*: 1033.1 *m/z* (3%) [M-1PF<sub>6</sub>]<sup>+</sup>, 888.1 (40%) [M-2PF<sub>6</sub>]<sup>+</sup>, 743.2 (38%) [M-3PF<sub>6</sub>]<sup>+</sup>, 598.2 (100%) [M-4PF<sub>6</sub>]<sup>+</sup>, 351.1 (45%) [M-(C<sub>17</sub>H<sub>15</sub>N<sub>2</sub>(4PF<sub>6</sub>))]<sup>+</sup>. HMRS (ESI) *m/z*: (C<sub>42</sub>H<sub>38</sub>F<sub>12</sub>N<sub>4</sub>P<sub>2</sub>)<sup>2+</sup> calc 444.13 found 444.11. IR spectrum (KBr, cm<sup>-1</sup>): 3137-3068 ν(C-H) (alkane), 1638 ν(C=N) and 834 δ(C=C).

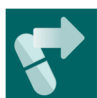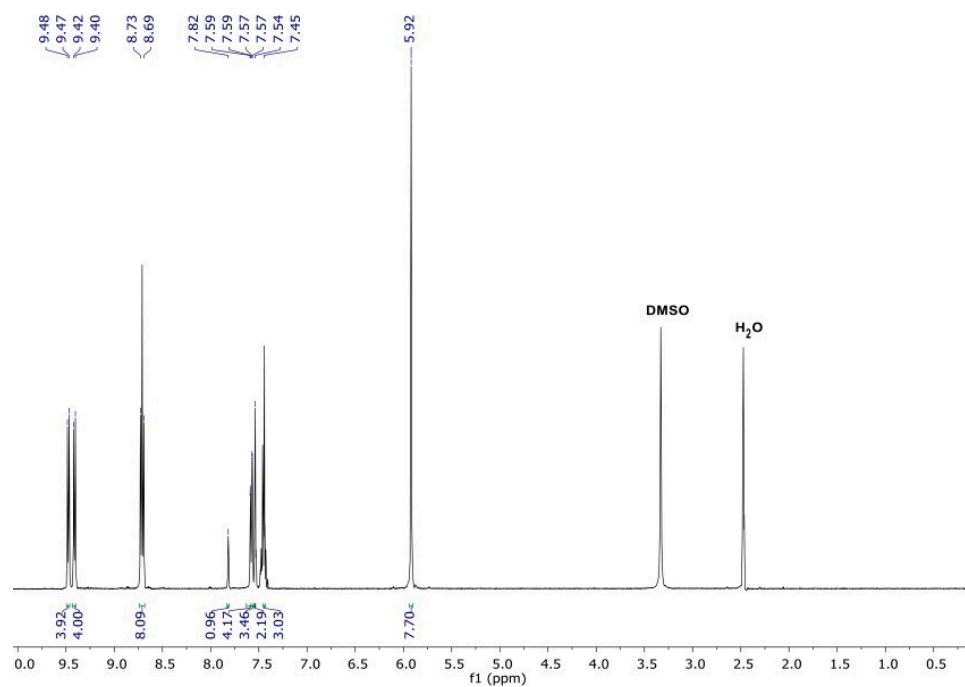

Figure S7. <sup>1</sup>H NMR (400 MHz) spectrum of 2·4PF<sub>6</sub> in (CD<sub>3</sub>)<sub>2</sub>SO.

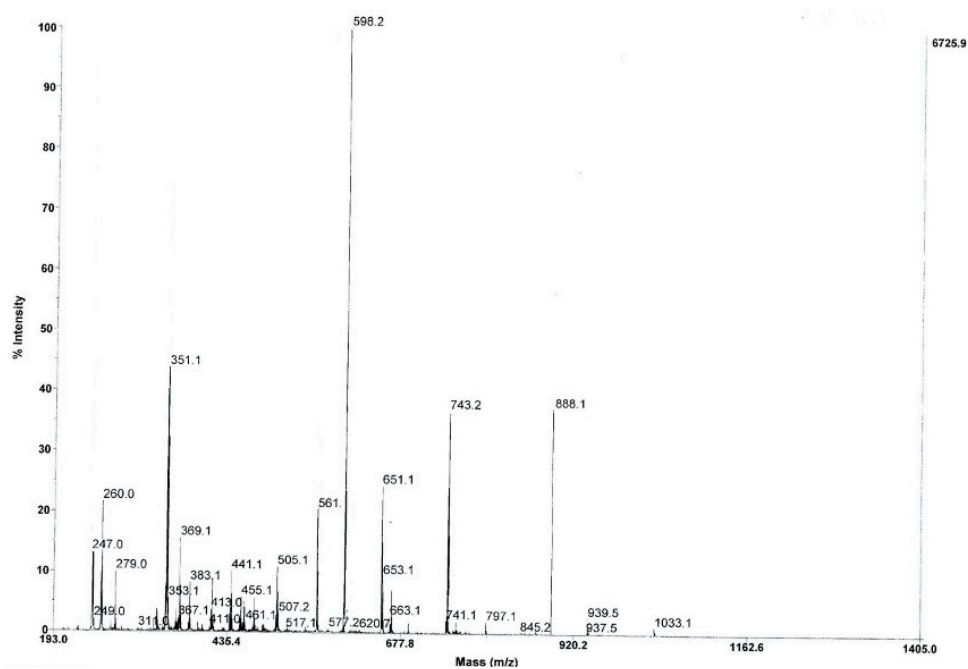

Figure S8. MALDI-TOF-MS (m/z) spectrum of 2·4PF<sub>6</sub> with matrix DHB.

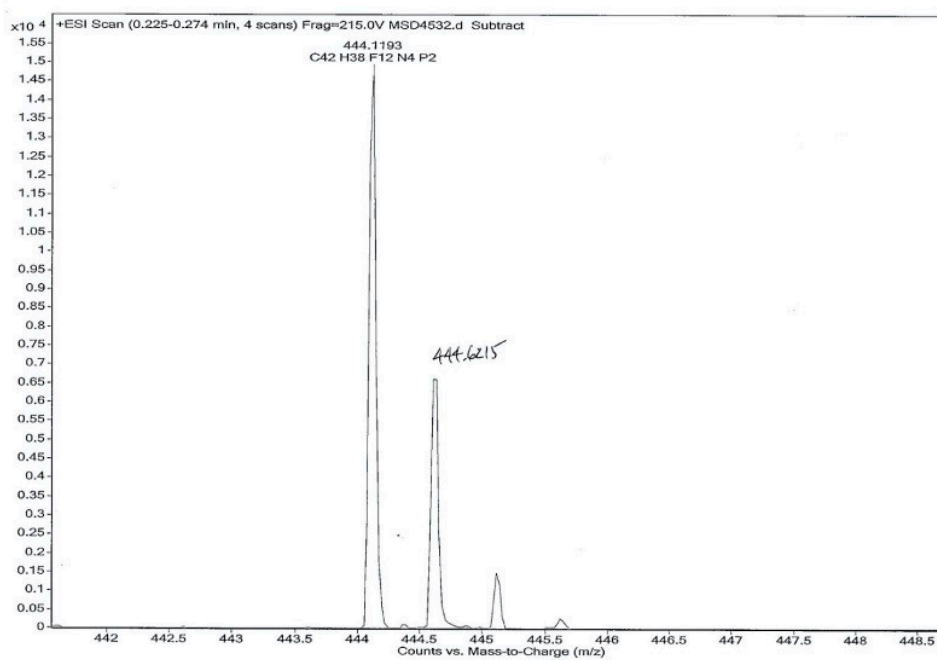

Figure S9. HMRS-ESI (m/z) spectrum of 2-4PF<sub>6</sub>.

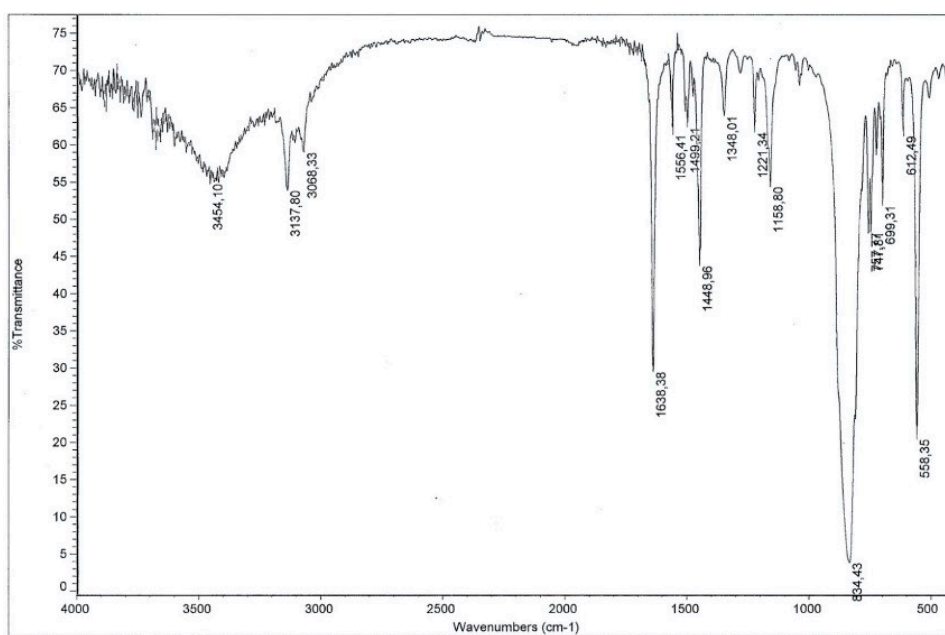

Figure S10. FT-IR transmittance spectrum of 2-4PF<sub>6</sub> in KBr.



1.3. Characterization of 1,3-Bis(1'-hexadecyl-4,4'-bipyridiniummethylene) Benzene-Tetrakis (Hexafluorophosphate) (3·4PF<sub>6</sub>)

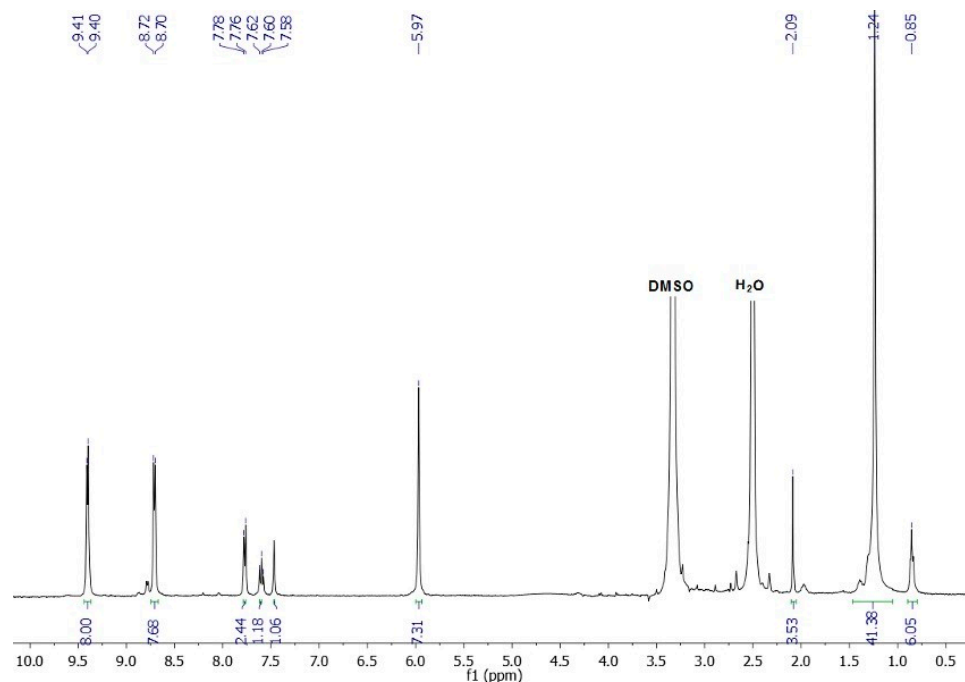

Figure S11. <sup>1</sup>H NMR (400 MHz) spectrum of 3·4PF<sub>6</sub> in (CD<sub>3</sub>)<sub>2</sub>SO.

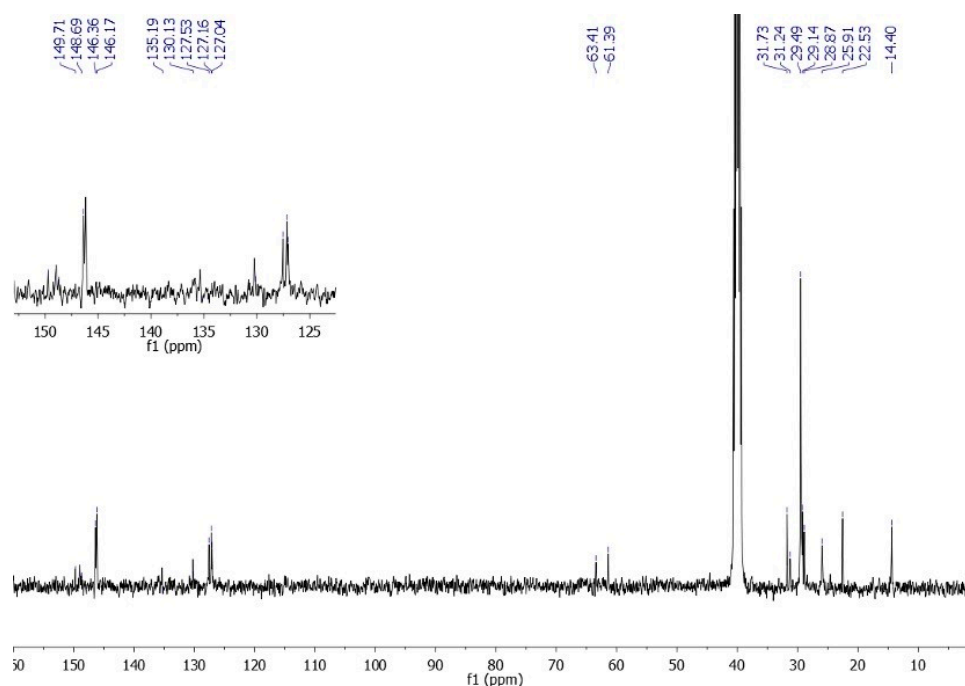

Figure S12. <sup>13</sup>C NMR (400 MHz) spectrum of 3·4PF<sub>6</sub> in (CD<sub>3</sub>)<sub>2</sub>SO.

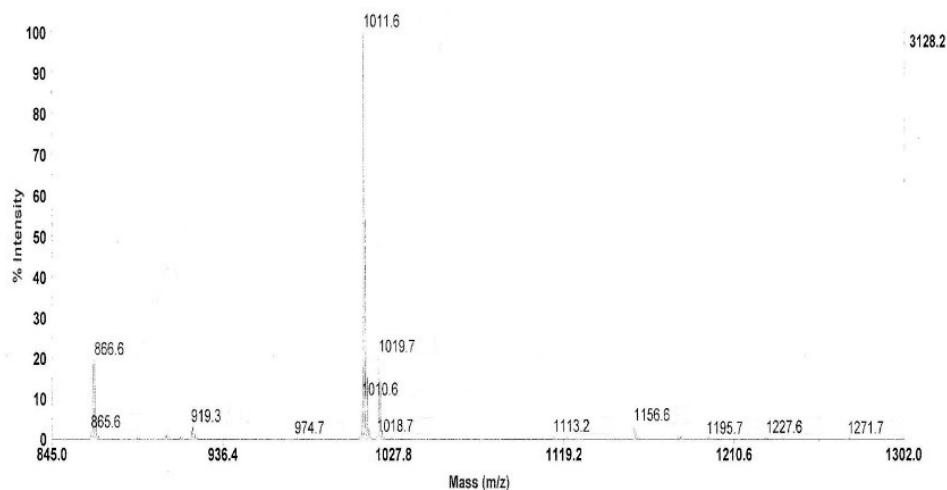

Figure S13. MALDI-TOF-MS (m/z) spectrum of 3-4PF<sub>6</sub> with matrix DHB.

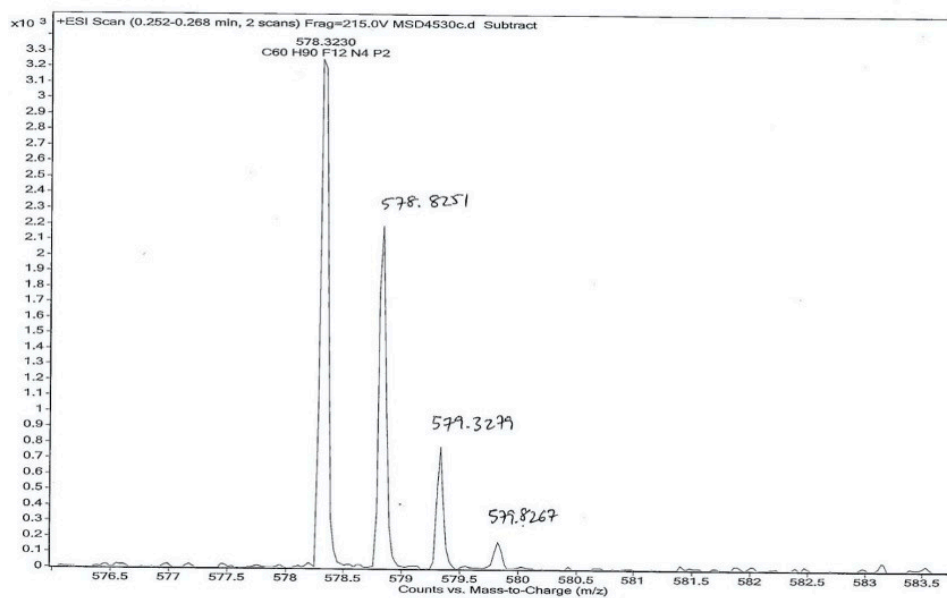

Figure S14. HMRS-ESI (m/z) spectrum of 3-4PF<sub>6</sub>.



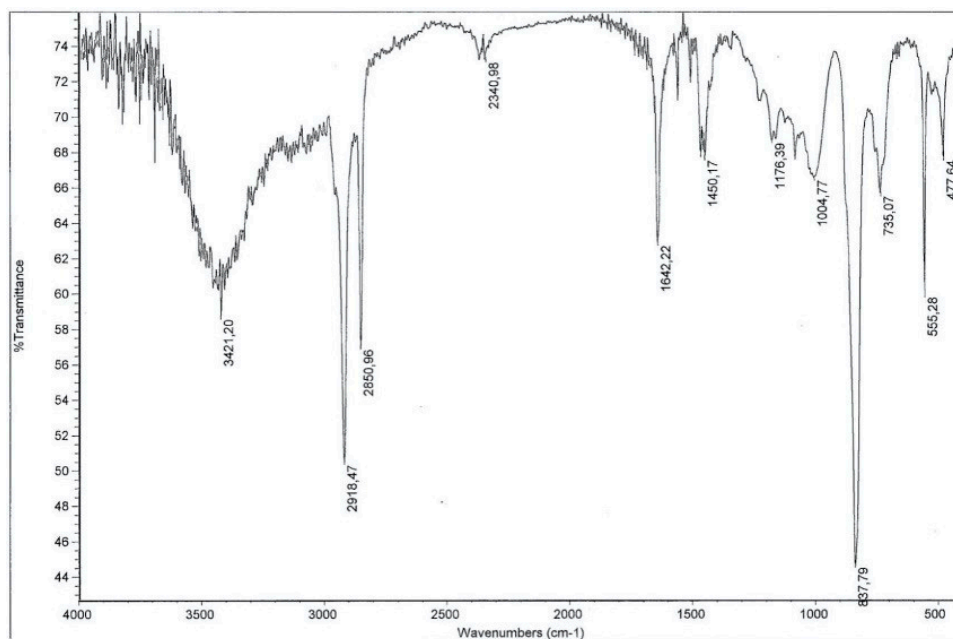

Figure S15. FT-IR transmittance spectrum of 3-4PF<sub>6</sub> in KBr.

1.4. Characterization of 1,3-Bis(1'-methyl-4,4'-bipyridiniummethylene)-5-propargyloxy-benzene-tetrakis (Hexafluorophosphate) (4-4PF<sub>6</sub>)

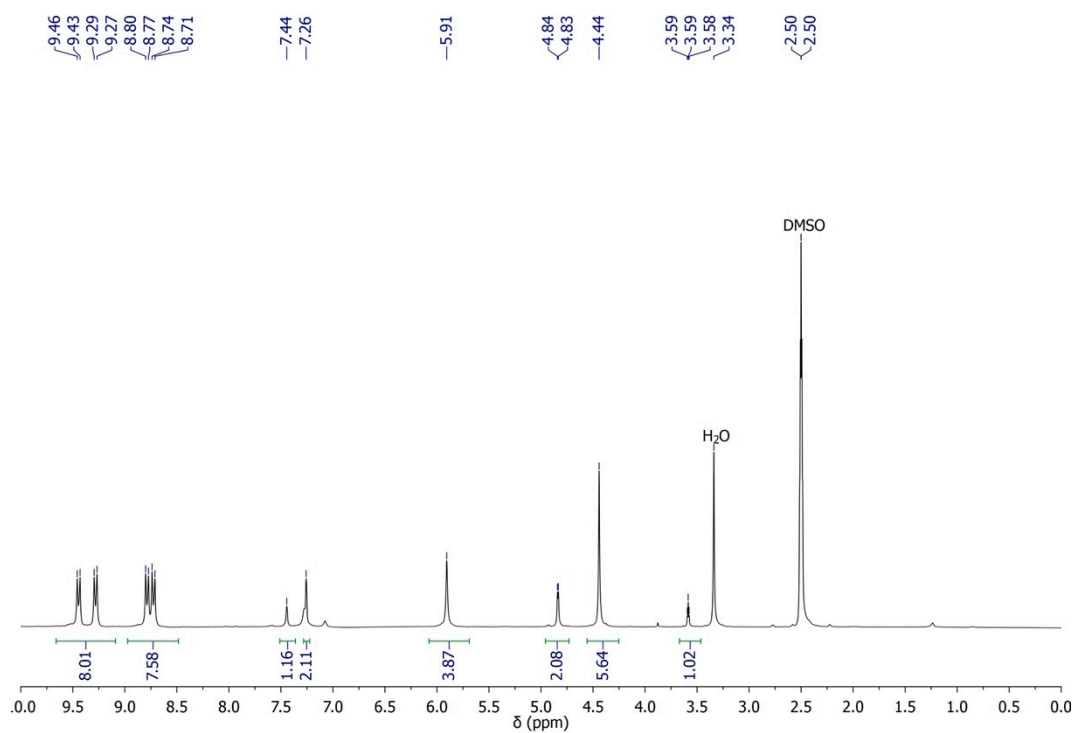

Figure S16. <sup>1</sup>H NMR (250 MHz) spectrum of 4-4PF<sub>6</sub> in DMSO.

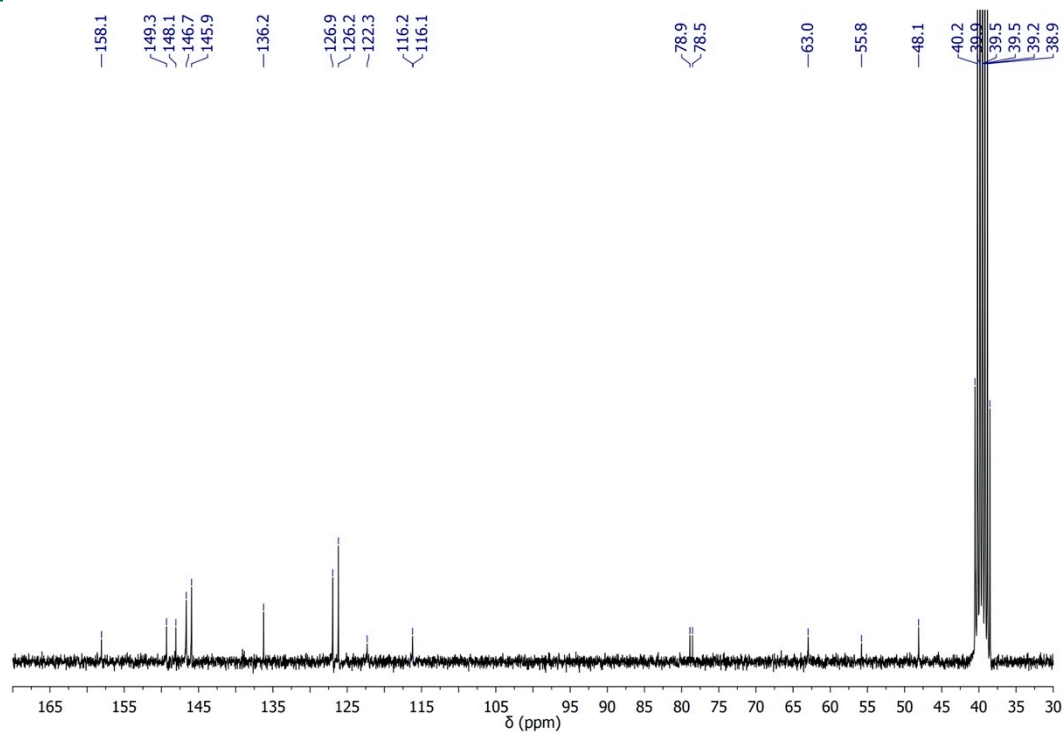

Figure S17.  $^{13}\text{C}$  NMR (250 MHz) spectrum of 4-4PF<sub>6</sub> in DMSO.

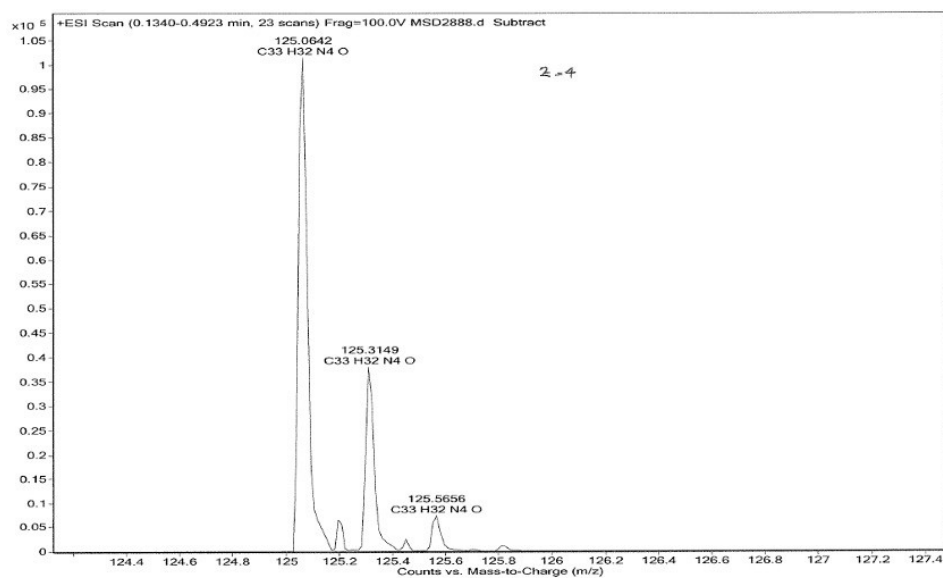

Figure S18. HMRS-ESI (m/z) spectrum of 4-4PF<sub>6</sub>.

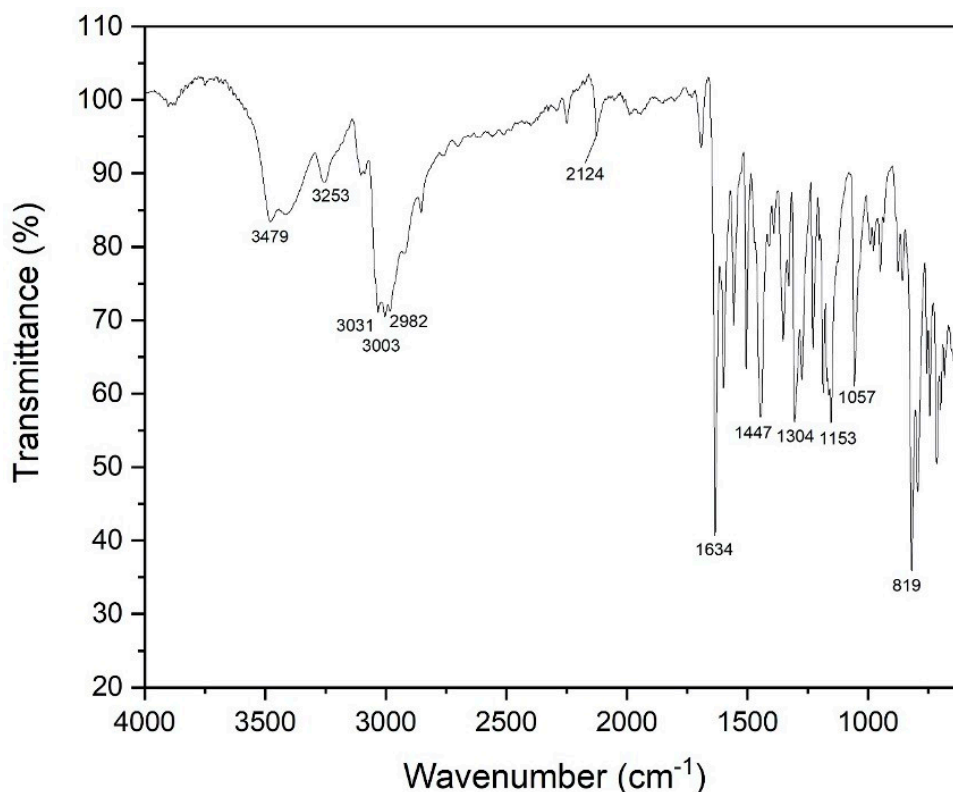

Figure S19. FT-IR (ATR) transmittance spectrum of **4-4PF<sub>6</sub>**.

*1.5. Synthesis and Characterization of 1,3-Bis (phenylene-4,4'-bipyridinium methylene) Benzene-Di(bromide) (5)*

A solution of 4,4'-bipyridine (3.1 g, 19.9 mmol) in dry CH<sub>3</sub>CN (30 mL) was added dropwise during 30 min to a solution of 1,3-bis(bromomethyl)benzene (2.2 g, 8.3 mmol) in dry CH<sub>3</sub>CN (40 mL), which was heated under reflux. Heating was continued for 2 h. After cooling down to room temperature, the yellow precipitate was filtered off and washed with CH<sub>3</sub>CN (10 mL) and dried under vacuum to afford **5** (4.7 g, 98%). mp = 260 °C (Refs: ~~Li et al.~~ [1,2]); <sup>1</sup>H NMR (300 MHz, (CD<sub>3</sub>)<sub>2</sub>SO, 25 °C): δ 9.35 (d, *J* = 6 Hz, 4H, H-9, 9', 15, 15'), 8.88 (d, *J* = 6 Hz, 4H, H-10, 10', 16, 16'), 8.68 (d, *J* = 6 Hz, 4H, H-13, 13', 19, 19'), 8.03 (d, *J* = 6 Hz, 4H, H-14, 14', 20, 20'); 7.76 (s; 1H, H-2), 7.58 (m; 3H, H-4, 5, 6), 5.91 (s; 4H, H-7, 8). MALDI-TOF-MS *m/z*: 415.1 (90%) [M-2Br-1H]<sup>+</sup>, 341.0 (45%) [M-(C<sub>10</sub>H<sub>8</sub>BrN<sub>2</sub>)]<sup>+</sup>, 261.1 (13%) [M-(C<sub>10</sub>H<sub>8</sub>Br<sub>2</sub>N<sub>2</sub>)]<sup>+</sup>.

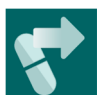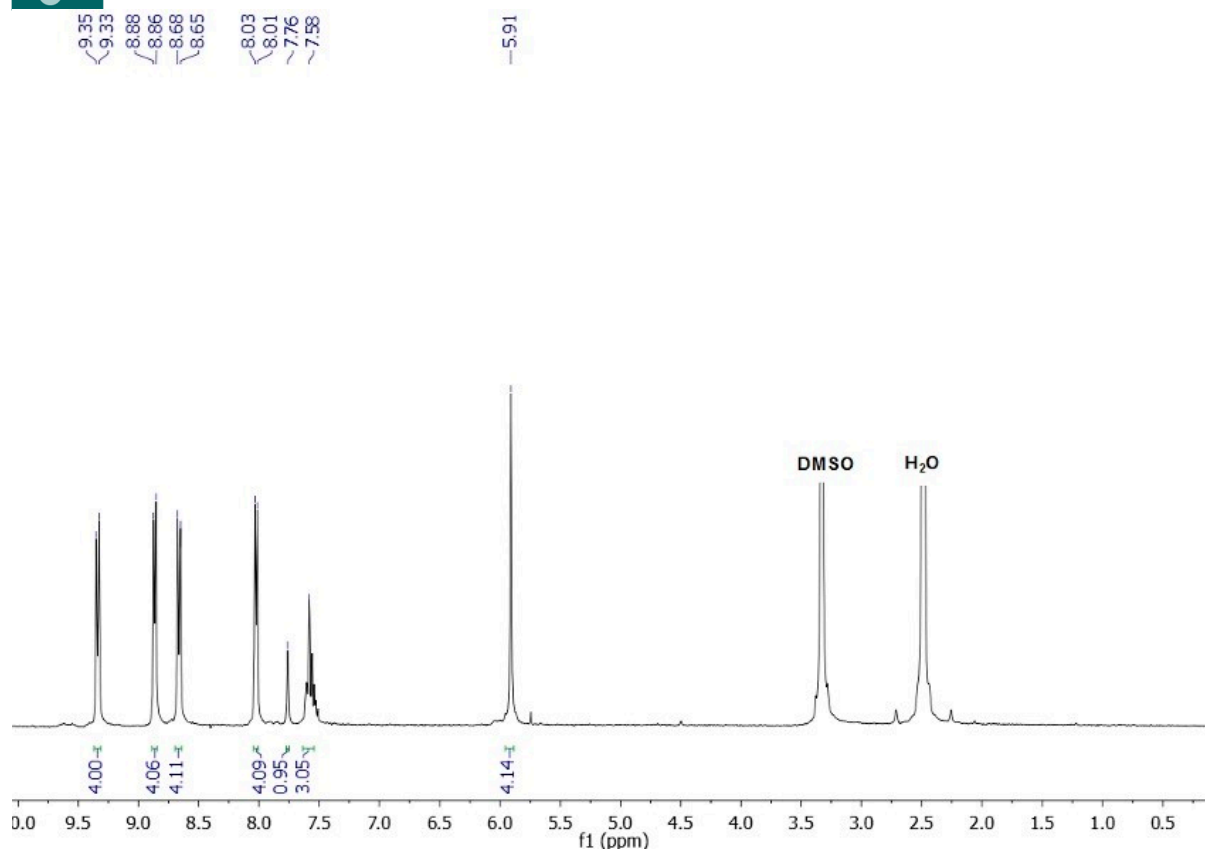

Figure S20. <sup>1</sup>H NMR (300 MHz) spectrum of 5 in (CD<sub>3</sub>)<sub>2</sub>SO.

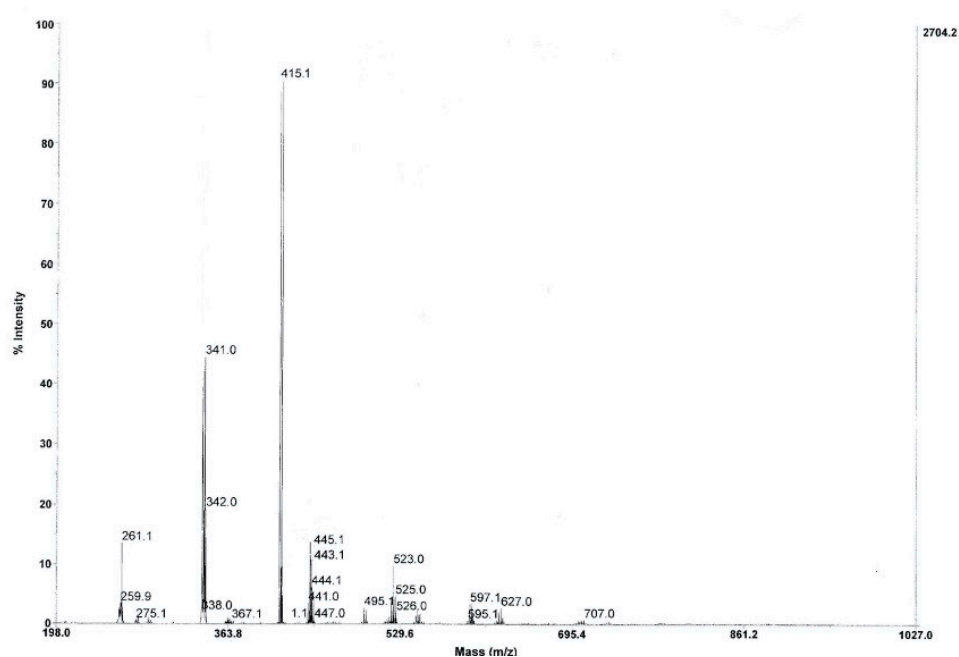

Figure S21. MALDI-TOF-MS (m/z) spectrum of 5 with matrix DHB.

## 2. UV-Vis Absorption Spectra of 1-4PF<sub>6</sub>, 4-4PF<sub>6</sub> and Neurotransmitters: D, S, A and NA

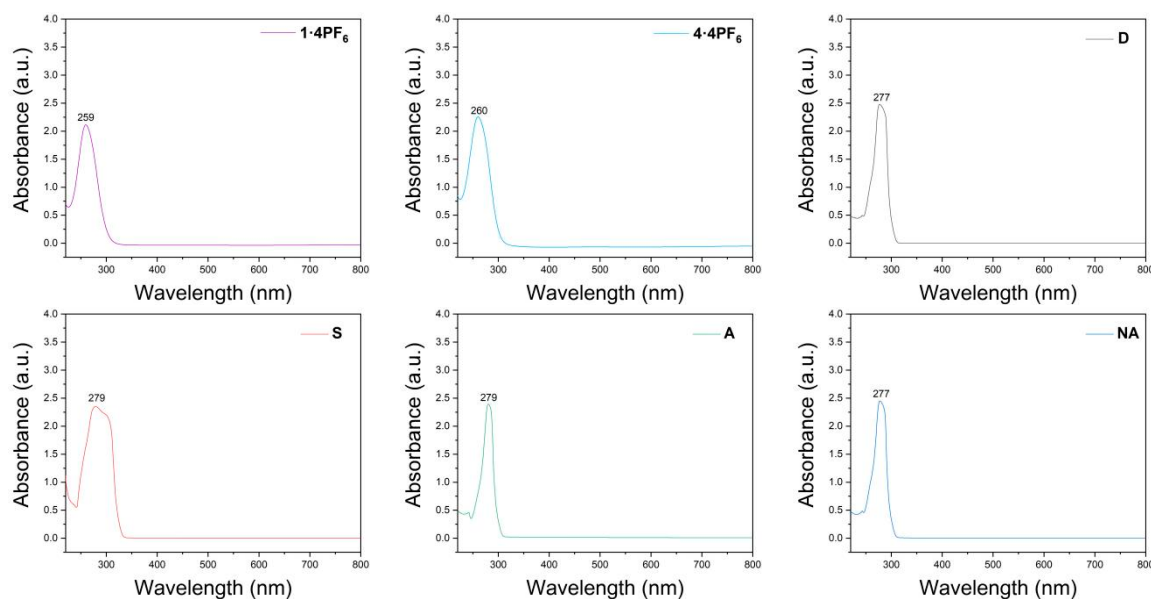

**Figure S22.** UV-Vis absorption spectra of 1-4PF<sub>6</sub>, 4-4PF<sub>6</sub>, D, S, A and NA in DMSO: H<sub>2</sub>O (4:1) at 1 mM.

## 3. Fluorescence Spectra of 1-4PF<sub>6</sub>, 4-4PF<sub>6</sub> and Neurotransmitters: D, S, A and NA and Their Corresponding Complexes

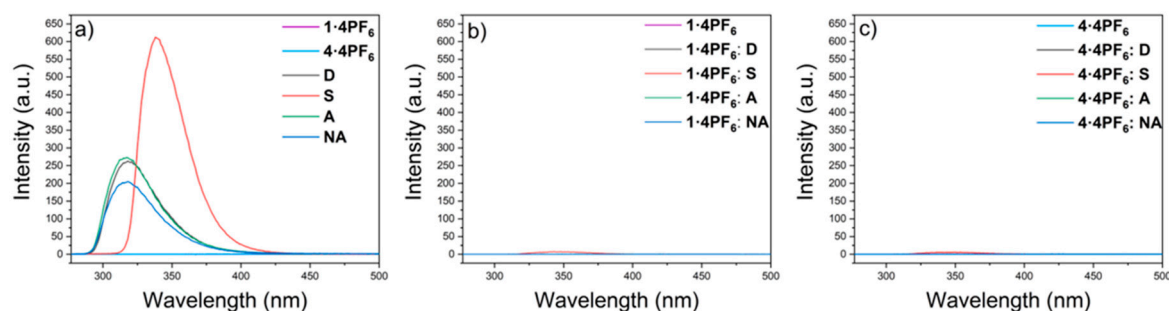

**Figure S23.** Fluorescence emission spectra of: (a) 1-4PF<sub>6</sub>, 4-4PF<sub>6</sub>, D, S, A and NA, respectively; (b) Complex formation of 1-4PF<sub>6</sub> with D, S, A and NA; (c) Complex formation of 4-4PF<sub>6</sub> with D, S, A and NA; All spectra were recorded at 2 mM in DMSO: H<sub>2</sub>O (4:1) at  $\lambda_{exc}$  = 259, 260, 277, 279, 279, 279 nm for 1-4PF<sub>6</sub>, 4-4PF<sub>6</sub>, D, S, A and NA, respectively.

## 4. Size Distribution Histograms of Microparticles

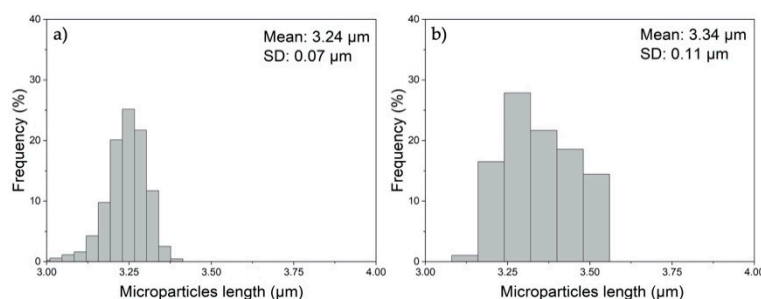

**Figure S1.** Particle size distribution histograms of: (a) Poly-Surfs analysing SEM images and 870 microparticles; (b) Poly-Si  $\mu$ Ps suspended in solution analysing optical microscope images and 100 microparticles.

## 5. Calibration Curve of A by HPLC Determination

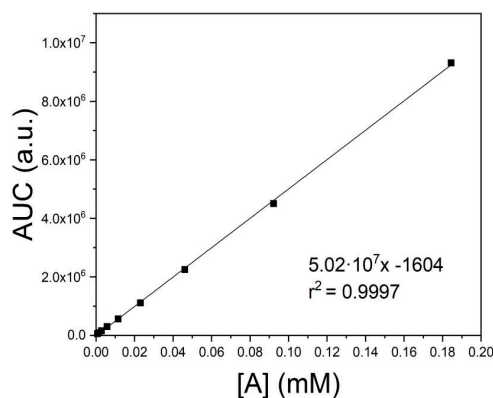

**Figure S25.** Calibration curve of **A** by HPLC coupled to a fluorescence detector at  $\lambda_{exc} = 280$  nm and  $\lambda_{em} = 315$  nm. The concentrations of **A** were: 0.18, 0.09, 0.04, 0.02, 0.01,  $5.8 \times 10^{-3}$ ,  $2.9 \cdot 10^{-3}$ ,  $1.4 \times 10^{-3}$ ,  $7.2 \times 10^{-4}$  mM, using deionized H<sub>2</sub>O as solvent and taking the area of the fluorescence peak at each concentration.

## 6. Particles Counting Protocol

Equation S(1) used for particles counting in a Neubauer chamber [3] by ImageJ software [4].

$$N(\text{microparticles}) = \frac{X \times 10000}{N^{\circ}\text{square} \times \text{dilution}} \quad (1)$$

$$X = \text{microparticles counted by ImageJ (Analyze particles)} \quad (2)$$

## 7. Fluorescence Chromatograms for Quantification of A Encapsulated in Poly-Si $\mu$ Ps by HPLC

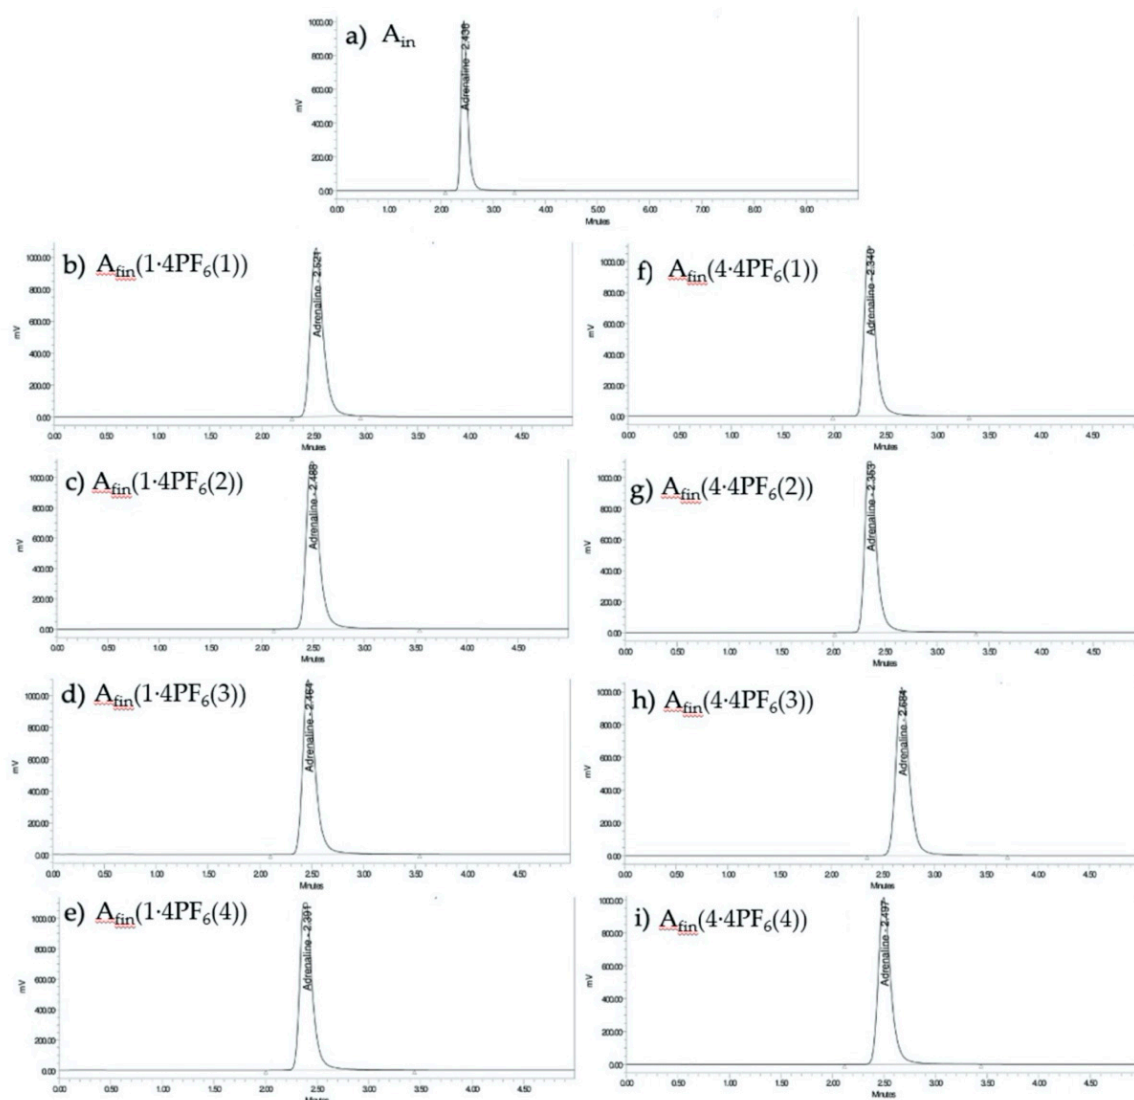

**Figure S26.** Fluorescence chromatograms of initial ( $A_{in}$ ) and final solutions ( $A_{fin}$ ) of **A** from respective 1–4 microtubes, before (a) and after the incubation with **1·4PF<sub>6</sub>** functionalized microparticles (b–e) or **4·4PF<sub>6</sub>** functionalized microparticles (f–i), by HPLC determination at  $\lambda_{exc} = 280$  nm and  $\lambda_{em} = 315$  nm.

**Table S1.** Values of retention time (RT) and area under the curve (AUC) extracted from the chromatograms at Figure S25.

|           |                                 | RT    | AUC (a.u) |
|-----------|---------------------------------|-------|-----------|
|           | $A_{in}$                        | 2.438 | 10712528  |
| $A_{fin}$ | ( <b>1·4PF<sub>6</sub></b> (1)) | 2.521 | 8959754   |
| $A_{fin}$ | ( <b>1·4PF<sub>6</sub></b> (2)) | 2.488 | 9778307   |
| $A_{fin}$ | ( <b>1·4PF<sub>6</sub></b> (3)) | 2.464 | 9254002   |
| $A_{fin}$ | ( <b>1·4PF<sub>6</sub></b> (4)) | 2.391 | 9413136   |
| $A_{fin}$ | ( <b>4·4PF<sub>6</sub></b> (1)) | 2.340 | 8359152   |
| $A_{fin}$ | ( <b>4·4PF<sub>6</sub></b> (2)) | 2.353 | 8892739   |
| $A_{fin}$ | ( <b>4·4PF<sub>6</sub></b> (3)) | 2.684 | 9189019   |
| $A_{fin}$ | ( <b>4·4PF<sub>6</sub></b> (4)) | 2.497 | 8551537   |

**Table S2.** Quantification of **A** encapsulated ( $A_{\text{encap.}}$ ) in **1-4PF<sub>6</sub>** and **4-4PF<sub>6</sub>** functionalized microparticles ( $\mu\text{P}$ ).

|                       | $A_{\text{in}}$ ( $\mu\text{mol}$ ) | $A_{\text{fin}}$ ( $\mu\text{mol}$ ) | $A_{\text{encap.}}$ ( $\mu\text{mol}$ ) | N <sup>o</sup> Particles  | $A_{\text{encap.}}/\text{Particle}$ ( $\mu\text{mol}$ ) |
|-----------------------|-------------------------------------|--------------------------------------|-----------------------------------------|---------------------------|---------------------------------------------------------|
| $\mu\text{P 1-4PF}_6$ | $1.71 \pm 0.02$                     | $1.49 \pm 0.01$                      | $0.22 \pm 0.01$                         | $5,064,000 \pm 3,275,131$ | $4.28 \times 10^{-8} \pm 0.01$                          |
| $\mu\text{P 4-4PF}_6$ | $1.71 \pm 0.02$                     | $1.39 \pm 0.01$                      | $0.32 \pm 0.01$                         | $4,027,000 \pm 1,927,456$ | $7.77 \times 10^{-8} \pm 0.01$                          |

## 8. UV-Vis solution Studies of Complex Formation (4-4PF<sub>6</sub>:A) and Disassembly Using Ascorbic Acid

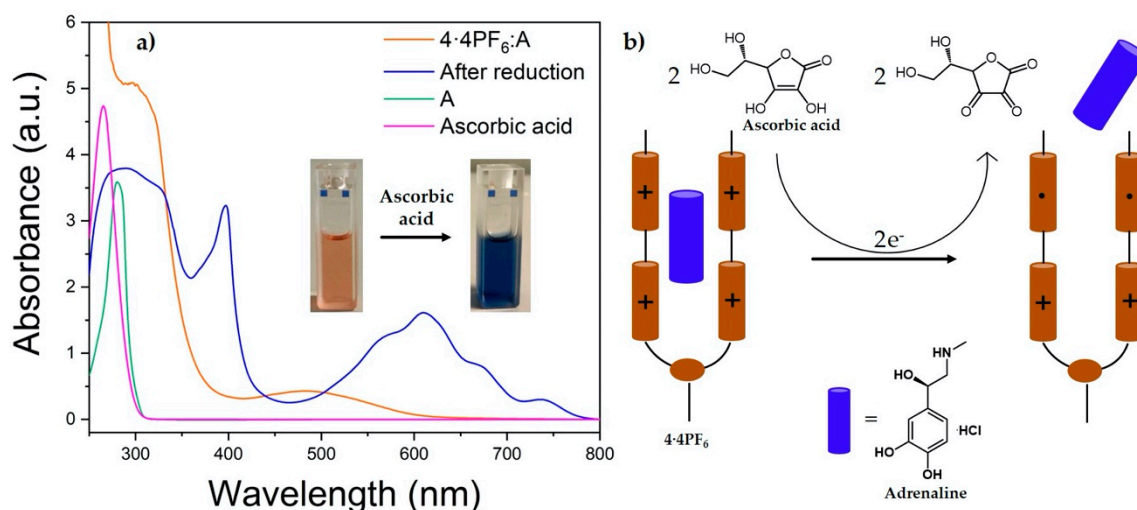

**Figure S2.** (a) UV-Vis absorption spectra of the complex formation **4-4PF<sub>6</sub>: A** (2 mM: 2 mM) in DMSO: H<sub>2</sub>O (4:1) after 24 h (orange line), the spectrum of the same solution after the addition of ascorbic acid (4 mM) (blue line), **A** (2 mM) (green line) and ascorbic acid (4 mM) (pink line); (b) Representation of the redox process after reduction of bipyridinium salt using ascorbic acid.





## 9. HPLC Solution Studies of Complex Formation and Disassembly Using Ascorbic Acid

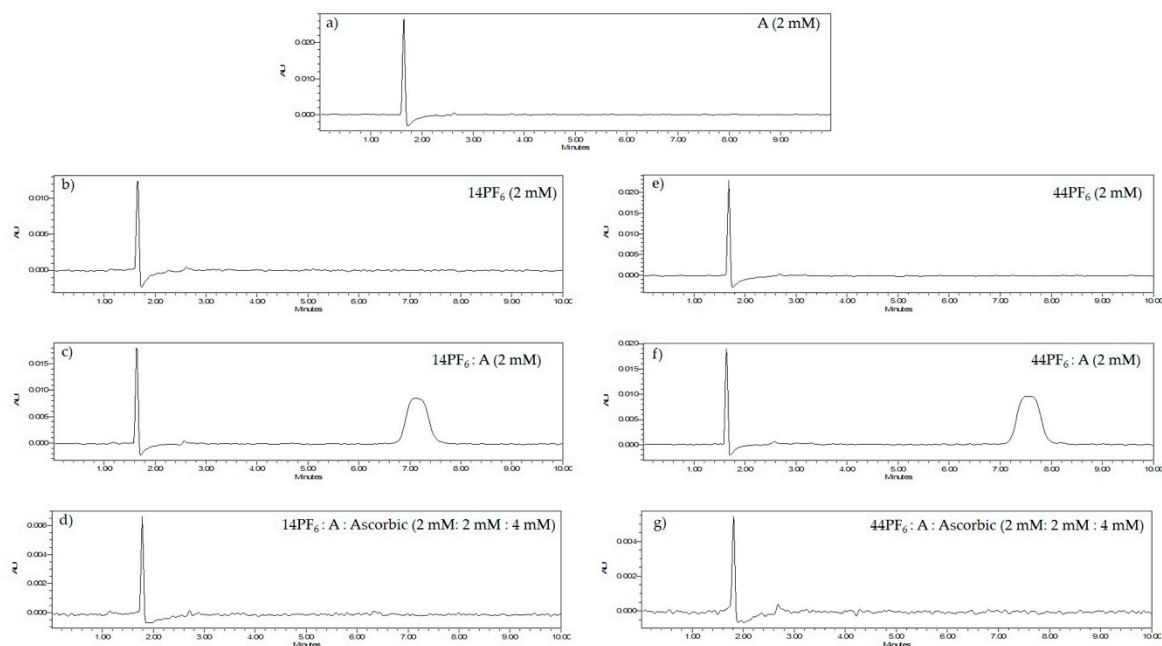

**Figure S28.** HPLC-UV-Vis chromatograms at absorbance wavelength of 479 nm of: (a) A (2 mM); (b) 1·4PF<sub>6</sub> (2 mM); (c) Complex of 1·4PF<sub>6</sub>: A (2 mM: 2 mM); (d) 1·4PF<sub>6</sub>: A: Ascorbic acid (2 mM: 2 mM: 4 mM); (e) 4·4PF<sub>6</sub> (2 mM); (f) Complex of 4·4PF<sub>6</sub>: A (2 mM: 2 mM); (g) 4·4PF<sub>6</sub>: A: Ascorbic acid (2 mM: 2 mM: 4 mM). All solutions were in DMSO:H<sub>2</sub>O (4:1).

## 10. UV-Vis Absorption Spectra of Complex Formation and Disassembly in Solution by HPLC

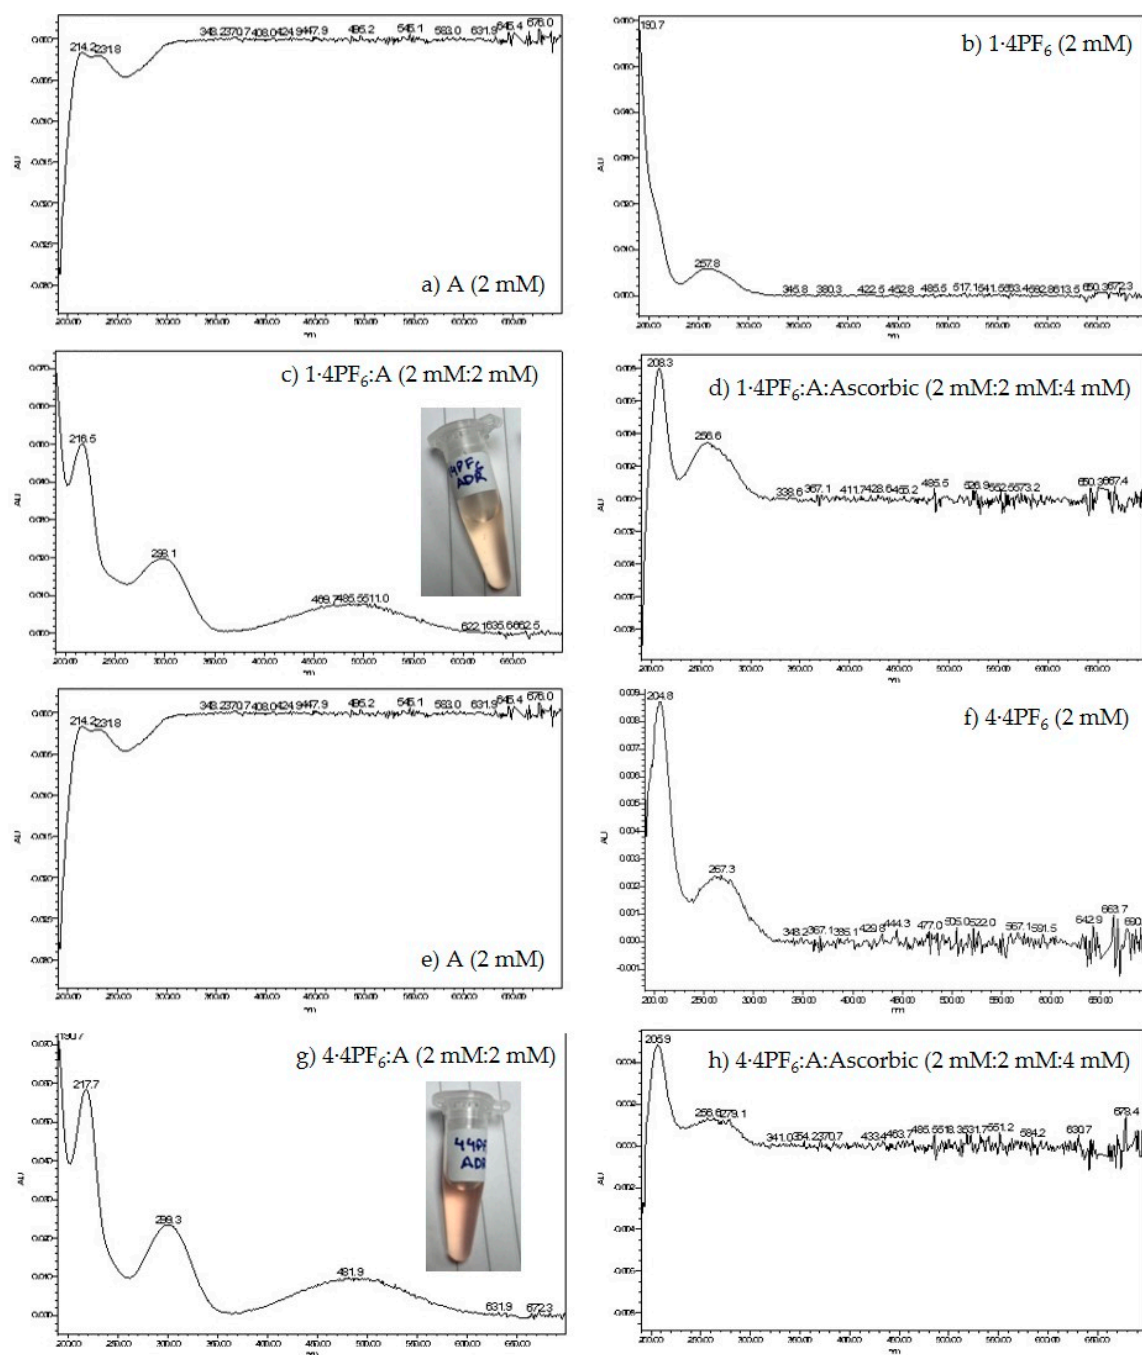

**Figure S29.** Absorption spectra extracted from the chromatograms at 479 nm from the solution experiments corresponding to retention times at 7.25 min (1-4PF<sub>6</sub>) and 7.50 min (4-4PF<sub>6</sub>), obtained by HPLC coupled with a UV-Vis absorption spectroscopy detector.

## 11. Fluorescence Chromatograms for Quantification of A Released by HPLC

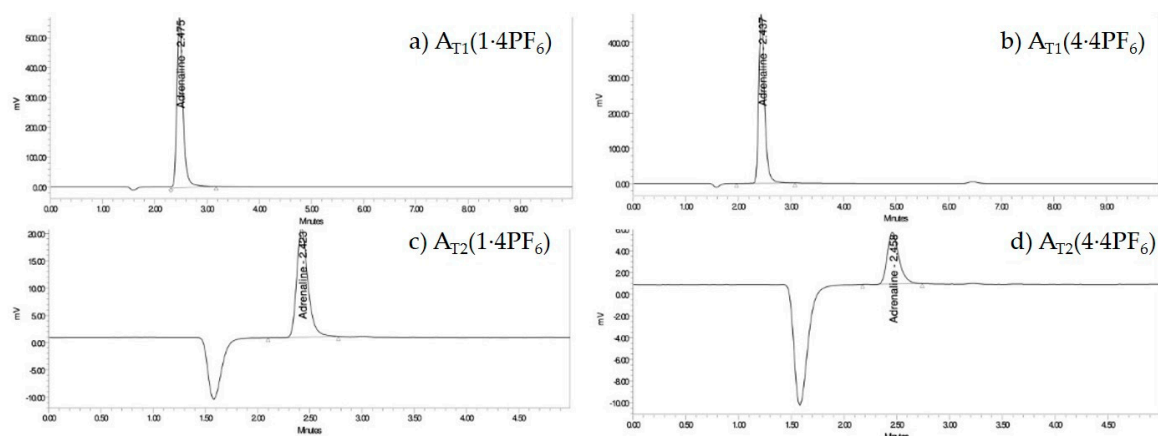

**Figure S3.** Fluorescence chromatograms of release solutions (T1 and T2) of **A** after the incubation of functionalized microparticles (**1-4PF<sub>6</sub>** and **4-4PF<sub>6</sub>**) with ascorbic acid (4 mM), by HPLC determination at  $\lambda_{exc}= 280$  nm and  $\lambda_{em}= 315$  nm.

**Table S3.** Values of retention time (RT) and area under the curve (AUC) for functionalized microparticles extracted from the chromatograms at Figure S.29.

|                                           | RT    | AUC (a.u) |
|-------------------------------------------|-------|-----------|
| <b>A<sub>T1</sub> (1-4PF<sub>6</sub>)</b> | 2.437 | 3667147   |
| <b>A<sub>T2</sub> (1-4PF<sub>6</sub>)</b> | 2.423 | 148759    |
| <b>A<sub>T1</sub> (4-4PF<sub>6</sub>)</b> | 2.475 | 4600523   |
| <b>A<sub>T2</sub> (4-4PF<sub>6</sub>)</b> | 2.458 | 36665     |

**Table S4.** Quantification of **A** released in functionalized microparticles with **1-4PF<sub>6</sub>** or **4-4PF<sub>6</sub>** using ascorbic acid.

|                                                | A <sub>encap.</sub><br>( $\mu$ mol) | A <sub>T1</sub> ( $\mu$ mol)      | A <sub>T2</sub> ( $\mu$ mol)                     | A <sub>released</sub><br>( $\mu$ mol) | N <sup>o</sup> particles     | A <sub>released</sub> /<br>particle<br>( $\mu$ mol) | A <sub>released</sub><br>(%) |
|------------------------------------------------|-------------------------------------|-----------------------------------|--------------------------------------------------|---------------------------------------|------------------------------|-----------------------------------------------------|------------------------------|
| <b><math>\mu</math>P<br/>1-4PF<sub>6</sub></b> | 0.22 $\pm$<br>0.01                  | 0.018 $\pm$ 0.01                  | 6.6·10 <sup>-4</sup> $\pm$<br>2·10 <sup>-4</sup> | 0.019 $\pm$ 0.01                      | 3,807,000 $\pm$<br>1,546,197 | 5.00·10 <sup>-9</sup> $\pm$ 0.02                    | 9 $\pm$ 0.01                 |
| <b><math>\mu</math>P<br/>4-4PF<sub>6</sub></b> | 0.32 $\pm$<br>0.01                  | 0.015 $\pm$<br>3·10 <sup>-3</sup> | 2.1·10 <sup>-4</sup> $\pm$<br>1·10 <sup>-4</sup> | 0.015 $\pm$<br>3·10 <sup>-3</sup>     | 3,192,000 $\pm$<br>892,825   | 4.67·10 <sup>-9</sup> $\pm$<br>6·10 <sup>-3</sup>   | 5 $\pm$ 0.3                  |

## 12. Stability Studies of A In Presence of Ascorbic Acid

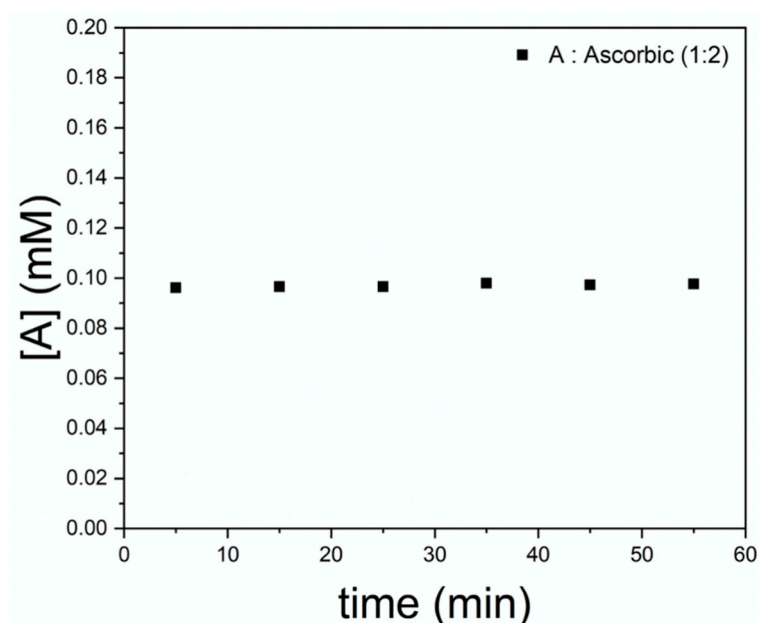

**Figure S4.** Stability study of A in presence of ascorbic acid in ratio A: ascorbic (1:2) using deionized H<sub>2</sub>O as solvent.

## 13. Cytotoxic Studies of 1·4PF<sub>6</sub>

**Table S5.** Results obtained for Cell viability and genotoxicity results for 1·4PF<sub>6</sub> in cell line 3T3/ NIH, with 500 µg/mL as maximum tested concentration; n/d not determined (viability < 70%).

| Compound           | Concentration (µg/ mL) | Viability (%) ± SD | Tail moment (%) ± SD |
|--------------------|------------------------|--------------------|----------------------|
| 1·4PF <sub>6</sub> | Control medium         | 100.0 ± 0.2        | 3.9 ± 4.7            |
|                    | Control vehicle        | 63.6 ± 15.2        | 2.8 ± 3.9            |
|                    | 500.0                  | 46.8 ± 2.3         | n/d                  |
|                    | 158.1                  | 15.4 ± 1.6         | n/d                  |
|                    | 50.0                   | 8.7 ± 2.2          | n/d                  |
|                    | 15.8                   | 79.3 ± 46.4        | 2.2 ± 1.9            |
|                    | 5.0                    | 150.5 ± 48.4       | 1.8 ± 1.7            |
|                    | Positive control       | 3.1 ± 0.3          | 51.2 ± 7.1           |

**Table S6.** Results obtained for Cell viability and genotoxicity results for 1·4PF<sub>6</sub>, in cell line HepG2, with 500 mg/mL as maximum tested concentration; n/d not determined (viability < 70%).

| Compound           | Concentration (µg/ mL) | Viability (%) ± SD | Tail moment (%) ± SD |
|--------------------|------------------------|--------------------|----------------------|
| 1·4PF <sub>6</sub> | Control medium         | 100.0 ± 0.5        | 3.1 ± 4.2            |
|                    | Control vehicle        | 77.4 ± 7.4         | 2.3 ± 2.8            |
|                    | 500.0                  | 74.7 ± 14.8        | 23.6 ± 7.0           |
|                    | 158.1                  | 24.1 ± 9.9         | 38.4 ± 11.4          |
|                    | 50.0                   | 14.1 ± 4.9         | n/d                  |
|                    | 15.8                   | 35.2 ± 20.3        | 27.5 ± 21.5          |
|                    | 5.0                    | 107.6 ± 37.5       | 8.9 ± 14.4           |
|                    | Positive control       | 4.0 ± 2.2          | 35.5 ± 9.6           |



**Table S7.** Results obtained for Cell viability and genotoxicity results for **1-4PF<sub>6</sub>**, in cell line **Caco-2**, with 500 µg/mL as maximum tested concentration; n/d not determined (viability < 70%).

| Compound                 | Concentration (µg/ mL) | Viability (%) ± SD | Tail moment (%) ± SD |
|--------------------------|------------------------|--------------------|----------------------|
| <b>1-4PF<sub>6</sub></b> | Control medium         | 100.0 ± 0.1        | 1.5 ± 2.0            |
|                          | Control vehicle        | 96.8 ± 8.3         | 2.4 ± 2.9            |
|                          | 500.0                  | 8.8 ± 3.6          | 18.4 ± 11.0          |
|                          | 158.1                  | 8.5 ± 3.1          | n/d                  |
|                          | 50.0                   | 50.5 ± 4.5         | 18.6 ± 17.1          |
|                          | 15.8                   | 86.9 ± 16.9        | 4.7 ± 4.5            |
|                          | 5.0                    | 113.7 ± 31.7       | 4.6 ± 5.1            |
|                          | Positive control       | 12.4 ± 2.7         | 27.1 ± 9.0           |

**Table S8.** Values of the IC<sub>50</sub> determined for the compound **1-4PF<sub>6</sub>** tested in the three different cell lines with a maximum tested concentration of 500 µg/mL.

| Compound                 | 3T3/ NIH                 |                       | HepG2                    |                       | Caco-2                   |                       |
|--------------------------|--------------------------|-----------------------|--------------------------|-----------------------|--------------------------|-----------------------|
|                          | IC <sub>50</sub> (µg/mL) | IC <sub>50</sub> (µM) | IC <sub>50</sub> (µg/mL) | IC <sub>50</sub> (µM) | IC <sub>50</sub> (µg/mL) | IC <sub>50</sub> (µM) |
| <b>1-4PF<sub>6</sub></b> | 146                      | 140                   | 152                      | 148                   | 125                      | 122                   |

## References

- Geuder, W.; Hünig, S.; Suchy, A. Single and double bridged viologenes and intramolecular pimerization of their cation radicals. *Tetrahedron* **1986**, *42*, 1665–1677.
- Ashton, P.R.; Pérez-García, L.; Stoddart, J.F.; Ballardini, R.; Balzani, V.; Credi, A.; Gandolfi, M.T.; Prodi, L.; Venturi, M.; Menzer, S.; et al. Molecular Meccano. 4. The Self-Assembly of [2] Catenanes Incorporating Photoactive and Electroactive  $\pi$ -Extended Systems. *J. Am. Chem. Soc.* **1995**, *117*, 11171–11197.
- Bastidas, O. Neubauer Chamber Cell Counting Available online: [https://www.academia.edu/13150839/Technical\\_Note-\\_Neubauer\\_Chamber\\_Cell\\_Counting-\\_1\\_Oscar\\_Bastidas](https://www.academia.edu/13150839/Technical_Note-_Neubauer_Chamber_Cell_Counting-_1_Oscar_Bastidas). (accessed on 12 March2020).
- Schneider, C.A.; Rasband, W.S.; Eliceiri, K.W. NIH Image to ImageJ: 25 years of image analysis. *Nat. Methods* **2012**, *9*, 671–675.
